# Supplementary material
Source: publisher figshare collection journal article supplement (https://acs.figshare.com/ndownloader/files/4962895)
Supplement: Supplementary file 1 [file 4962895]

Supporting Information for the manuscript

**Stabilities and Reconstructions of Clean PbS and PbSe Surfaces:  
DFT Results and the Role of Dispersion Forces**

Volker L. Deringer<sup>a</sup> and Richard Dronskowski<sup>a,b,\*</sup>

<sup>a</sup>*Institute of Inorganic Chemistry, RWTH Aachen University, Landoltweg 1, 52056 Aachen, Germany*

<sup>b</sup>*Jülich–Aachen Research Alliance (JARA-HPC), RWTH Aachen University, 52056 Aachen, Germany*

E-mail: drons@HAL9000.ac.rwth-aachen.de

**Table S1** (as supplement to Table 3 in the main text): Surface Energies of Pristine and Reconstructed PbS and PbSe (111) Surfaces at the DFT-PBE Level of Theory

|          |       | $\gamma$ (meV $\text{\AA}^{-2}$ ), PBE |                      |                      |                      |
|----------|-------|----------------------------------------|----------------------|----------------------|----------------------|
|          |       | <b>PbS</b>                             |                      | <b>PbSe</b>          |                      |
|          | term. | Pb poor <sup>a</sup>                   | Pb rich <sup>b</sup> | Pb poor <sup>c</sup> | Pb rich <sup>b</sup> |
| pristine | Pb    | 90                                     | 55                   | 84                   | 49                   |
|          | S/Se  | 51                                     | 87                   | 39                   | 74                   |
| SV       | Pb    | 45                                     | 27                   | 43                   | 26                   |
|          | S/Se  | 38                                     | 55                   | 32                   | 49                   |
| MgO      | Pb    | 72                                     | 54                   | 69                   | 51                   |
|          | S/Se  | 67                                     | 85                   | 57                   | 74                   |
| 2×1      | Pb    | 22                                     | 22                   | 20                   | 20                   |
|          | S/Se  | 27                                     | 27                   | 26                   | 26                   |
| oct      | Pb    | 21                                     | 21                   | 21                   | 21                   |
|          | S/Se  | 21                                     | 21                   | 20                   | 20                   |

<sup>a</sup>Defined as  $\mu_{\text{Pb}} = E_{\text{PbS}}^{(\text{bulk})} - E_{\text{S}}^{(\text{bulk})}$ . <sup>b</sup>In both cases, defined as  $\mu_{\text{Pb}} = E_{\text{Pb}}^{(\text{bulk})}$ .

<sup>c</sup>Here,  $\mu_{\text{Pb}} = E_{\text{PbSe}}^{(\text{bulk})} - E_{\text{Se}}^{(\text{bulk})}$ .

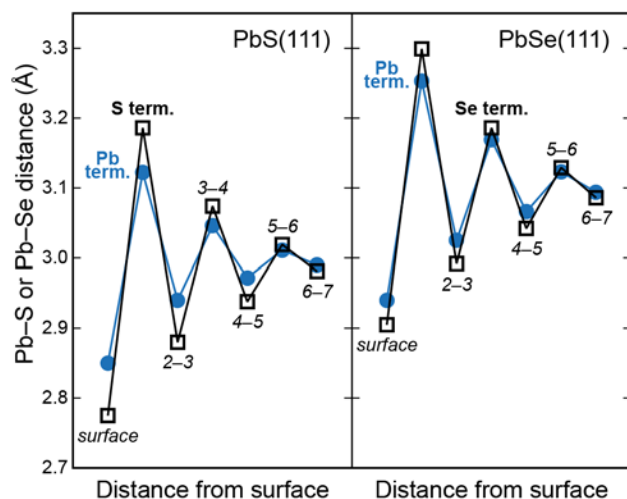

**Figure S2** (as supplement to Figure 3 in the main text): Course of Pb–S and Pb–Se bond lengths near the relaxed, pristine (111) surfaces. Results at the PBE level of theory are shown.

**Table S2** (as supplement to Table 4 in the main text): Structural Properties of Reconstructed PbS and PbSe (111) Surfaces at the PBE Level of Theory<sup>a</sup>

|             |       |          | $d_1$ (Å) | $d_2$ (Å) | $d_3$ (Å) |
|-------------|-------|----------|-----------|-----------|-----------|
| <b>PbS</b>  | (2×1) | Pb-term. | 2.65      | 2.77      | —         |
|             |       | S-term.  | 2.63      | 2.78      | —         |
|             | oct.  | Pb-term. | 2.72      | 2.82      | 2.85      |
|             |       | S-term.  | 2.73      | 2.77      | 2.95      |
| <b>PbSe</b> | (2×1) | Pb-term. | 2.78      | 2.89      | —         |
|             |       | Se-term. | 2.78      | 2.91      | —         |
|             | oct.  | Pb-term. | 2.84      | 2.95      | 2.96      |
|             |       | Se-term. | 2.86      | 2.89      | 3.07      |

<sup>a</sup>The parameters  $d_1$ ,  $d_2$ , and  $d_3$  are defined in Figure 4 in the main text.
